# Supplementary material for: MARTINI bead form factors for the analysis of time-resolved X-ray scattering of proteins
Source: PubMed Central journal article supplement (PMC4119947; doi:10.1107/s1600576714009959), 2014-06-14

MARTINI bead form factors for the analysis of  
time-resolved X-ray scattering of proteins:  
Form factor library for MARTINI beads

Stephan Niebling, Alexander Björling and Sebastian Westenhoff<sup>1</sup>

<sup>1</sup>Department of Chemistry and Molecular Biology, University of Gothenburg,  
Box 462, SE-40530 Gothenburg, Sweden

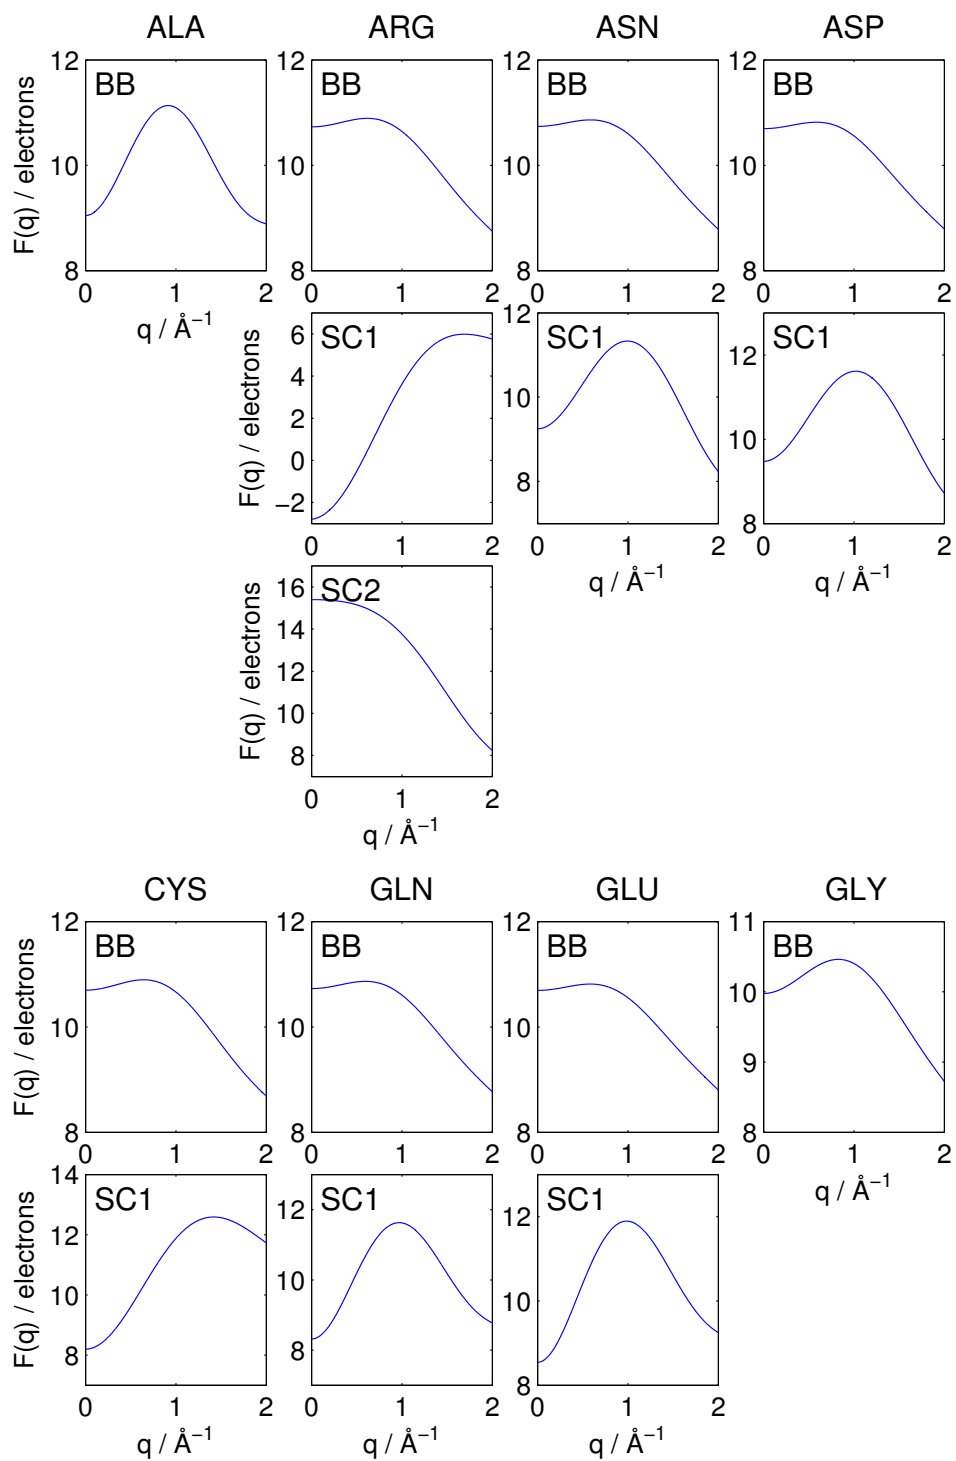

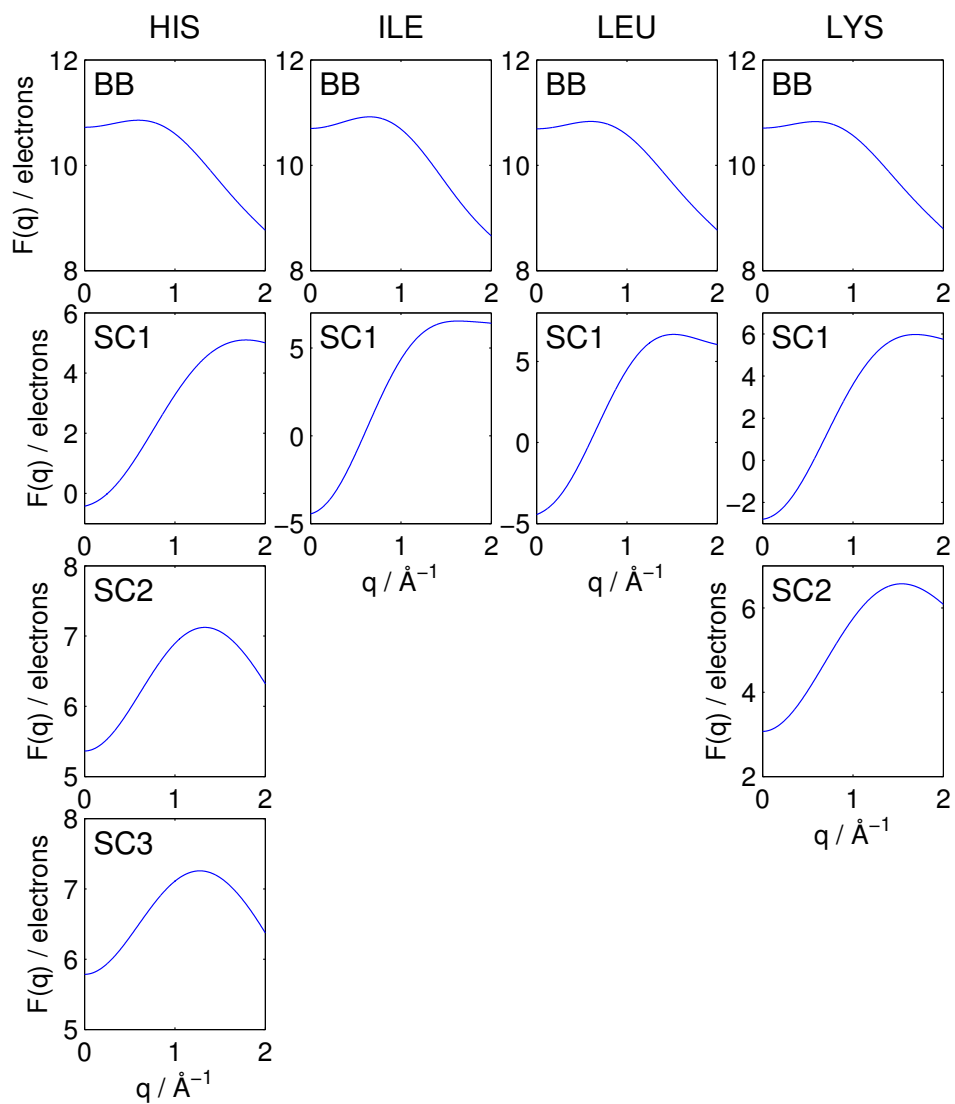

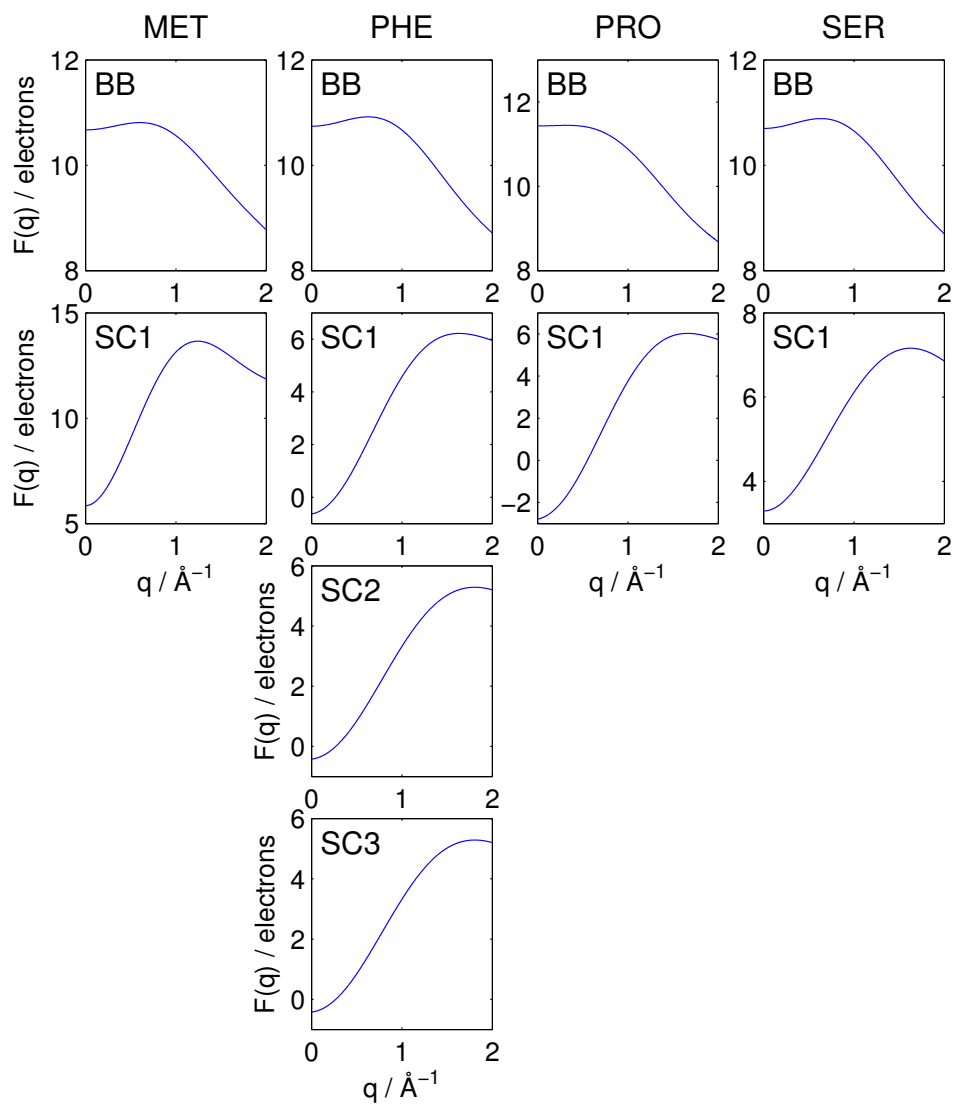

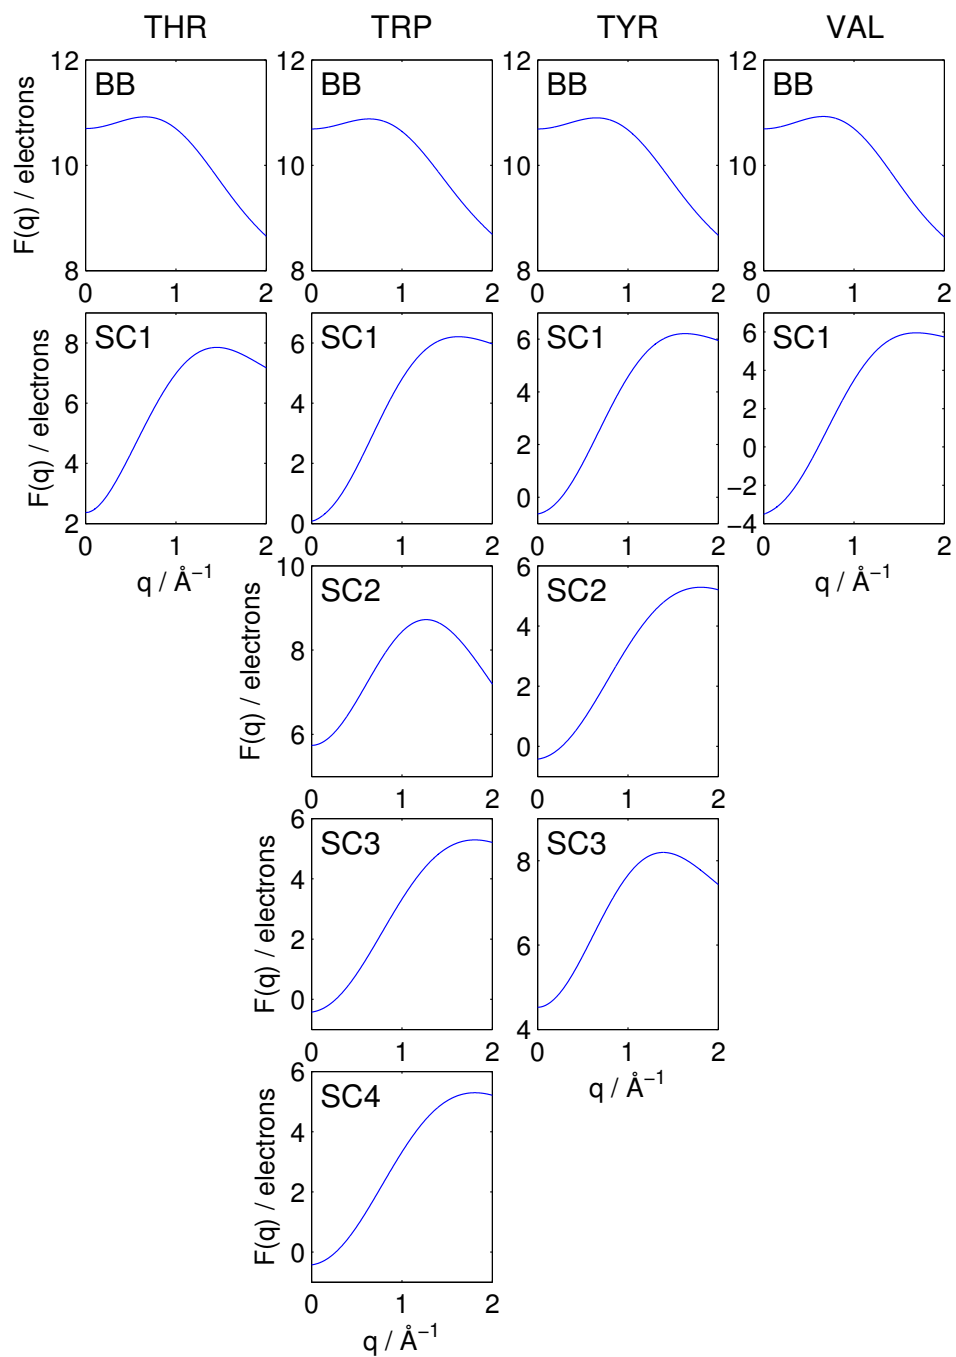

Supplement: j-47-01190-sup1.pdf [file j-47-01190-sup1.pdf]
